# Supplementary material for: Competition between water uptake and ice nucleation by glassy organic aerosol particles
Source: Copernicus journal article supplement (doi:10.5194/acp-14-12513-2014), 2014-11-27
Supplement: Supplementary file 1 [file acp-14-12513-2014-supplement.zip]

## Supplementary Material

### Competition between water uptake and ice nucleation by glassy organic aerosol particles

T. Berkemeier<sup>1,2,\*</sup>, M. Shiraiwa<sup>1</sup>, U. Pöschl<sup>1</sup> and T. Koop<sup>2,\*</sup>

[1] Multiphase Chemistry Department, Max Planck Institute for Chemistry, Mainz, Germany

[2] Faculty of Chemistry, Bielefeld University, Bielefeld, Germany

Correspondence to: T. Berkemeier ([t.berkemeier@mpic.de](mailto:t.berkemeier@mpic.de)), T. Koop ([thomas.koop@uni-bielefeld.de](mailto:thomas.koop@uni-bielefeld.de))

#### 1. Treatment of gas diffusion

To account for local depletion of trace gases in the near-surface gas phase of aerosol particles acting as a sink for the respective gases, Shiraiwa et al. (2012) use a gas phase diffusion correction factor for species Z,  $C_{g,Z}$ , as described previously by Pöschl et al. (2007). In this formalism a corrected near-surface trace gas concentration  $[Z]_{gs}$  is obtained through the uptake coefficient of Z,  $\gamma_Z$ , and the Knudsen number  $Kn_Z$  of the diffusion system. Since the trace gas uptake  $\gamma_Z$  itself depends on  $[Z]_{gs}$  and thus via  $C_{g,Z}$  on its own value, this formalism significantly increases the stiffness of the set of differential equations that needs to be solved. In the new formalism, a different approach of gas phase diffusion correction is employed. The approach assumes a gaseous shell with a thickness of one mean free path  $\lambda_Z$  around the particle as well, but treats all mass fluxes to and from this shell explicitly in a separate differential equation. In particular, the diffusion flow  $F_{net,Z}$  from this far-surface gas phase into the near-surface gas shell can be calculated as diffusion through a virtual particle envelope with  $d_p + 2 \lambda_Z$  diameter (Pöschl et al., 2007). Applying Fick's first law yields

$$F_{net,g,Z} = 4\pi(r_p + \lambda_Z)D_{g,Z}([Z]_g - [Z]_{gs}). \quad (S1)$$

Since in all calculations that we performed, particle size was approximately on the order of the mean free path, we chose the respective limiting case for calculation of the mean free path

27  $\lambda_Z$  differently from Pöschl et al. (2007) by using Eq. (S2) as given in Seinfeld and Pandis  
 28 (2006) and valid for  $d_p \approx \lambda_Z$ .

$$\lambda_Z = \frac{1.7 D_{gZ}}{\omega_Z} \quad (\text{S2})$$

## 29 **2. Physico-chemical parameterizations**

30 In the following sections we list all physico-chemical parameterizations employed in this  
 31 study. For simulations of the sucrose/water model system, we use parameterizations for  
 32 density, water activity and bulk diffusivity by Zobrist et al. (2011). Glass transition values are  
 33 taken from Zobrist et al. (2008), gas diffusivities of water from Winkler et al. (2006), while  
 34 vapor pressures of ice and water are taken from Murphy and Koop (2005). A few  
 35 miscellaneous model parameters are compiled in Table S3.

### 36 **2.1. Density**

37 For the sucrose/water system density can be parameterized as a function of the organic weight  
 38 fraction  $w_{\text{org}}$  with a fourth-order polynomial function (Zobrist et al., 2011).

$$\rho_{\text{tot}}(w_{\text{org}}) = a_0 + a_1 w_{\text{org}} + a_2 w_{\text{org}}^2 + a_3 w_{\text{org}}^3 + a_4 w_{\text{org}}^4 \quad (\text{S3})$$

39 where  $a_0 = 0.9989$ ,  $a_1 = 0.3615$ ,  $a_2 = 0.2964$ ,  $a_3 = -0.3186$  and  $a_4 = 0.24191$ .

40 For all other systems, volume additivity was assumed, leading to the following expression of  
 41 density as function of  $w_{\text{org}}$  and density  $\rho_{\text{org}}$  of the pure compounds.

$$\rho_{\text{tot}}(w_{\text{org}}) = \frac{1}{(1 - w_{\text{org}}) + \frac{w_{\text{org}}}{\rho_{\text{org}}}} \quad (\text{S4})$$

### 42 **2.2. Water activity**

43 For the determination of water activity from composition data, several different approaches  
 44 are used. For sucrose and levoglucosan, parameterizations from Zobrist et al. (2011) and  
 45 Zobrist et al. (2008) are used, respectively. In these parameterizations, water activity is  
 46 described as function of temperature and organic weight fraction as follows:

$$a_w(T, w_{\text{org}}) = \frac{1 + aw_{\text{org}}}{1 + bw_{\text{org}} + cw_{\text{org}}^2} + (T - T^{\ominus})(dw_{\text{org}} + ew_{\text{org}}^2 + fw_{\text{org}}^3 + gw_{\text{org}}^4) \quad (\text{S5})$$

Parameters for these two substances are given in Table S4. For substances for which no previous parameterization was available, we employ Kappa-Koehler theory, using the single hygroscopicity parameter  $\kappa_{\text{org}}$  or the equivalent van't Hoff parameter  $i_{\text{org}}$  to determine water activity (Petters and Kreidenweis, 2007).

$$a_w(w_{\text{org}}) = \frac{1}{1 + \frac{\kappa_{\text{org}}}{p_{\text{org}}} \cdot \frac{w_{\text{org}}}{1 - w_{\text{org}}}} = \frac{1}{1 + i_{\text{org}} \cdot \frac{M_w}{M_{\text{org}}} \frac{w_{\text{org}}}{1 - w_{\text{org}}}} \quad (\text{S6})$$

For citric acid, a composition-dependent fit of  $i_{\text{org}}$  has been provided by Koop et al. (2011).

$$i_{\text{org}} = 1 + 2.1408w_{\text{org}}^2 \quad (\text{S7})$$

Lienhard et al. (2012) give an alternative parameterization that behaves differently especially at lower temperatures (cf. Figure B2). We note however that at  $T < 220$  K we use the parameterization outside of its validity range. The functional form of this parameterization is given in Eq. (S8) and parameters given in Table S5.

$$a_w = \frac{1 - w_{\text{org}}}{1 + q \cdot w_{\text{org}} + r \cdot w_{\text{org}}^2} \quad (\text{S8})$$

$$q = a_1 + a_2T + a_3T^2$$

$$r = a_4 + a_5T + a_6T^2$$

### 2.3. Bulk diffusivity

Bulk diffusivity of water in the aqueous organic mixtures,  $D_{\text{H}_2\text{O}}$ , is parameterized using a (modified) Vogel-Fulcher-Tammann (VFT) approach that uses three parameters to account for its super-Arrhenius dependence on temperature (Vogel, 1921; Fulcher, 1925; Tammann and Hesse, 1926).

$$D_{\text{H}_2\text{O}}(T, a_w) = 10^{-\left(A(a_w) + \frac{B(a_w)}{T - T_0(a_w)}\right)} \quad (\text{S9})$$

Here,  $T_0$  is the so-called Vogel temperature, indicating the temperature at which  $D_{\text{H}_2\text{O}}$  goes to zero.  $T_0$  is closely related to the Kauzmann temperature,  $T_k$ , that is the hypothetical point where the entropy of amorphous and crystalline solid would coincide, which is often referred to as the ‘‘Kauzmann paradox’’ (Kauzmann, 1948; Stillinger, 1988). Parameter  $A$  can be

regarded as the high temperature maximum of water diffusivity ( $T \gg T_0$ ), whereas  $B$  represents the steepness of the viscous slowdown, the so-called *fragility* (Angell, 1985, 1995). According to Angell (1985), a liquid with low  $B$  exhibits *fragile* character, indicating a strong deviation of the temperature dependence from Arrhenius behaviour. Liquids with high  $B$  on the other hand (e.g. network formers such as  $\text{SiO}_2$ ) show the typical Arrhenius behaviour and are classified as *strong* liquids.

Zobrist et al. (2011) provided a set of water activity-dependent fit functions for the sucrose/water system based on experimental data over a wide temperature and concentration range.

$$A(a_w) = 7 + 0.175(1 - 46.46(1 - a_w)) \quad (\text{S10})$$

$$B(a_w) = 262.867(1 + 10.53(1 - a_w) - 0.3(1 - a_w)^2) \quad (\text{S11})$$

$$T_0(a_w) = 127.9(1 + 0.4514(1 - a_w) - 0.5(1 - a_w)^{1.7}). \quad (\text{S12})$$

#### 2.4. Glass transition

In a binary system glass transition temperatures of mixtures can be described as a function of  $w_{\text{org}}$  by the Gordon-Taylor equation (Gordon and Taylor, 1952), using the glass transition temperature of the pure components ( $T_{\text{g,H}_2\text{O}}$  and  $T_{\text{g,org}}$ ) and the Gordon-Taylor coefficient  $k_{\text{GT}}$ :

$$T_g(w_{\text{org}}) = \frac{(1 - w_{\text{org}}) T_{\text{g,w}} + \frac{1}{k_{\text{GT}}} w_{\text{org}} T_{\text{g,org}}}{(1 - w_{\text{org}}) + \frac{1}{k_{\text{GT}}} w_{\text{org}}} \quad (\text{S13})$$

The component with the lower glass transition temperature, in this case water, acts as a plasticizer, decreasing the glass point of the mixture with decreasing weight fraction  $w_{\text{org}}$ .

#### 2.5. Gas phase diffusivity

The gas phase diffusion coefficient of water can be obtained using the temperature and pressure dependent parameterization provided in Winkler et al. (2006),

$$D_{\text{g,H}_2\text{O}}(T, p) = 1.9545 T^{1.6658} p^{-1}. \quad (\text{S14})$$

#### 2.6. Vapor pressures of ice and water

Above 110 K, the vapor pressure of hexagonal ice is parameterized according to Murphy and Koop (2005) as

$$p_{\text{ice}}(T) = \exp\left(9.550426 - \frac{5723.265}{T} + 3.53068 \ln T - 0.00728332 T\right). \quad (\text{S15})$$

86 For the vapor pressure of water, Murphy and Koop provided

$$\begin{aligned} \ln p_{\text{liq}}(T) = & 54.842763 - \frac{6763.22}{T} - 4.210 \ln T + 0.000367 T \\ & + \tanh[0.0415(T - 218.8)] \left( 53.878 - \frac{1331.22}{T} \right. \\ & \left. - 9.44523 \ln T + 0.014025 T \right) \end{aligned} \quad (\text{S16})$$

87 for temperatures between 123 K and 332 K. Both parameterizations have been used in this

88 study.

89

90 **Supporting Tables**

91 Table S1. SOA marker substances used to estimate water diffusivities and estimated melting  
 92 point and glass transition values.

| Name                                | Structure                                                                           | <i>M</i><br>(g mol <sup>-1</sup> ) | <i>T</i> <sub>m</sub> , est./ (lit.) (K) | <i>T</i> <sub>g</sub> , est. (K) |
|-------------------------------------|-------------------------------------------------------------------------------------|------------------------------------|------------------------------------------|----------------------------------|
| <b>A-PINENE</b>                     |                                                                                     |                                    |                                          |                                  |
| C107OOH <sup>†</sup>                | 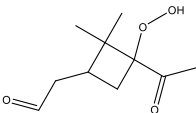   | 200.231                            | 320.01                                   | 224.01                           |
| PINONIC <sup>†</sup> / pinonic acid |    | 184.232                            | 349.60 (378.65)                          | 244.72                           |
| C97OOH <sup>†</sup>                 |    | 188.221                            | 346.31                                   | 242.41                           |
| C108OOH <sup>†</sup>                |   | 216.231                            | 323.83                                   | 226.68                           |
| C89CO2H <sup>†</sup>                |  | 170.206                            | 348.78                                   | 244.15                           |
| PINIC <sup>‡</sup> / pinic acid     |  | 186.205                            | 420.30<br>(355)                          | 294.21                           |
| C921OOH <sup>†</sup>                |  | 204.220                            | 367.19                                   | 257.03                           |
| C109OOH <sup>†</sup>                |  | 200.231                            | 298.17                                   | 208.72                           |
| C812OOH <sup>†</sup>                |  | 190.194                            | 441.53                                   | 309.07                           |

|                                             |                                                                                     |         |        |        |
|---------------------------------------------|-------------------------------------------------------------------------------------|---------|--------|--------|
| HOPINONIC <sup>†</sup>                      | 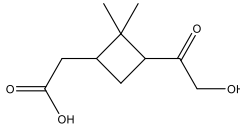   | 200.232 | 371.25 | 259.88 |
| C811OH <sup>†</sup>                         |    | 158.094 | 380.32 | 266.22 |
| C813OOH <sup>†</sup>                        |    | 206.193 | 548.31 | 383.81 |
| ALDOL_dimer <sup>‡</sup>                    |    | 368.421 | 391.59 | 274.11 |
| ESTER_dimer <sup>‡</sup>                    |    | 368.421 | 424.07 | 296.85 |
| pinonaldehyde                               |    | 168.23  | 278.08 | 194.65 |
| terpenylic acid                             |  | 172,17  | 433.1  | 303.66 |
| 2-hydroxy<br>terpenylic acid                |  | 188,17  | 524.57 | 367.20 |
| diaterpenylic acid<br>acetate               |  | 232,22  | 391.86 | 274.31 |
| 3-MBCTA                                     |  | 204.177 | 480.26 | 336.18 |
| <b>ISOPRENE</b>                             |                                                                                     |         |        |        |
| C <sub>5</sub> alkene triol (aldol<br>form) |  | 118.127 | 304.68 | 213.28 |
| C <sub>5</sub> alkene triol (keto<br>form)  |  | 118.127 | 346.16 | 242.31 |

|                                             |                                                                                     |         |                            |         |
|---------------------------------------------|-------------------------------------------------------------------------------------|---------|----------------------------|---------|
| 2-methyltetrol                              | 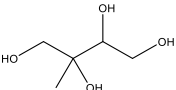   | 136.142 | 404.73                     | 283.31  |
| C <sub>5</sub> trihydroxy acid              |    | 150.125 | 441.04                     | 308.73  |
| hemiacetal dimer                            |    | 254.269 | 407.63                     | 285.34  |
| methyltetrol performate                     |    | 180.15  | 393.30                     | 275.31  |
| 2-methylglyceric acid                       |    | 120.1   | 416.87                     | 291.81  |
| 2-MG/mono- acetate dimer                    |    | 162.14  | 381.46                     | 267.02  |
| 2-MG/2-MG dimer                             |   | 222.185 | 475.66                     | 332.96  |
| (2-MG) <sub>3</sub> trimer                  |  | 324.27  | 500.75                     | 350.52  |
| (2-MG) <sub>4</sub> tetramer                | ...                                                                                 | 426.355 | 516.47                     | 361.53  |
| <b>NAPHTHALENE</b>                          |                                                                                     |         |                            |         |
| Kautzman122 <sup>s</sup> /<br>benzoic acid  |  | 122.116 | 384.80<br>(395.5)          | 269.36* |
| Kautzman138 <sup>s</sup>                    |  | 138.115 | 459.00<br>(431.75)         | 321.30* |
| Kautzman166 <sup>s</sup> /<br>phthalic acid |  | 166.124 | 538.92<br>(403.15 decomp.) | 377.25* |
| 1-Hydroxy-naphthalene                       |  | 144.170 | 362.87<br>(368.15)         | 257.71* |



|                                                          |                                                                                     |         |                    |         |
|----------------------------------------------------------|-------------------------------------------------------------------------------------|---------|--------------------|---------|
| 2-Hydroxy-naphthalene                                    | 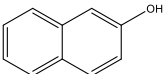   | 144.170 | 362.87<br>(394.65) | 276.26* |
| 1,2-naphthalene-dione                                    |    | 158.154 | 457.35<br>(419.15) | 293.41* |
| 1,4-naphthalene-dione                                    |    | 158.154 | 457.35<br>(401.65) | 281.16* |
| 2-Hydroxy-1,4-naphthalenedione                           |    | 174.153 | 533.47<br>(468)    | 327.60* |
| 5-Hydroxy-1,4-naphthalenedione                           |    | 174.153 | 396.32<br>(428)    | 299.60* |
| Kautzman192 <sup>§</sup> /<br>2-carboxy-cinnamic<br>acid |  | 192.171 | 561.06<br>(473.15) | 331.21* |
| <b>DODECANE</b>                                          |                                                                                     |         |                    |         |
| CARB <sup>§</sup>                                        |  | 184.31  | 272.12             | 190.48  |
| THF derivative                                           |  | 200.31  | 368.27             | 257.79  |
| CARBROOH <sup>§</sup>                                    |  | 216.31  | 311.74             | 218.22  |
| OHDICARB <sup>§</sup>                                    |  | 214.29  | 284.36             | 199.05  |
| Peroxydiol1                                              |  | 248.35  | 307.59             | 215.31  |
| Peroxydiol2                                              |  | 374.58  | 326.45             | 228.51  |

|                             |                                                                                   |        |        |        |
|-----------------------------|-----------------------------------------------------------------------------------|--------|--------|--------|
| Peroxyketone1               | 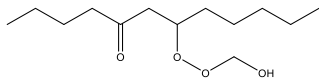 | 246.33 | 285.74 | 200.02 |
| Peroxyketone2               |  | 386.59 | 329.43 | 230.60 |
| OHCARBROOH <sup>§</sup>     |  | 232.31 | 314.74 | 220.32 |
| CnACID C7H14O3 <sup>§</sup> |  | 146.18 | 328.47 | 229.93 |
| Zhang299 <sup>¶</sup>       |  | 214.29 | 270.86 | 189.60 |
| Zhang301 <sup>¶</sup>       |  | 216.27 | 296.82 | 207.77 |
| Zhang315 <sup>¶</sup>       |  | 230.29 | 308.34 | 215.84 |

\*: Glass transition temperature estimated from literature melting point.

†: Compound name adopted from MCM (master chemical mechanism).

‡: Compound name adopted from Zuend and Seinfeld (2012).

§: Compound name refers to MS peak with according m/z in Kautzman et al. (2010).

§: Compound name adopted from Yee et al. (2012).

¶: Compound name refers to MS peak with according m/z in Zhang et al. (2014).

100 Table S2. Full list of upper temperature limits (in K) for heterogeneous ice nucleation.

| SOA Class   | O/C | Lower<br>estimate | Best guess | Upper<br>estimate |
|-------------|-----|-------------------|------------|-------------------|
| A-PINENE    | 0.3 | 207.48            | 212.56     | 217.69            |
|             | 0.5 | 213.20            | 217.46     | 221.88            |
|             | 0.7 | 215.80            | 220.90     | 225.96            |
| ISOPRENE    | 0.6 | 202.43            | 210.67     | 218.73            |
|             | 0.8 | 206.21            | 211.99     | 218.10            |
|             | 1.0 | 206.28            | 213.28     | 220.38            |
| NAPHTHALENE | 0.3 | 223.06            | 226.06     | 229.09            |
|             | 0.5 | 219.21            | 223.27     | 227.37            |
|             | 0.7 | 216.08            | 221.46     | 226.72            |
| DODECANE    | 0.1 | 211.79            | 215.73     | 219.55            |
|             | 0.3 | 205.69            | 209.29     | 213.15            |
|             | 0.5 | 199.12            | 204.92     | 211.10            |

101

102     Table S3. Various model parameters.

| $T_{\text{g,H2O}}$ (K) | $\alpha_{\text{s,0}}$ (°) | $\tau_{\text{D,H2O}}$ (s) | $\rho_{\text{org}}$ (g cm <sup>-3</sup> ) | $M_{\text{org}}$ (g mol <sup>-1</sup> ) |
|------------------------|---------------------------|---------------------------|-------------------------------------------|-----------------------------------------|
| 136                    | 1                         | 4e-11                     | 1.4                                       | 250                                     |

103

104     Table S4. Parameters for water activity parameterization, Eq. (S5).

| Substance    | a        | b        | c        | d          | e         | f          | g         |
|--------------|----------|----------|----------|------------|-----------|------------|-----------|
| Sucrose      | −1       | −0.99721 | 0.13599  | 0.001688   | −0.005151 | 0.009607   | −0.006142 |
| Levoglucozan | −0.99918 | −0.90978 | 0.021448 | 0.00045933 | 0.0035813 | 0.00026549 | 0.0033059 |

105

106 Table S5. Parameters for water activity parameterization, Eq. (S8), after Lienhard et al.  
107 (2012).

| Substance   | a <sub>1</sub> | a <sub>2</sub> | a <sub>3</sub> | a <sub>4</sub> | a <sub>5</sub> | a <sub>6</sub> |
|-------------|----------------|----------------|----------------|----------------|----------------|----------------|
| Citric acid | -3.16761       | 0.01939        | -4.02725e-5    | 6.59108        | -0.05294       | 1.06028e-4     |

108

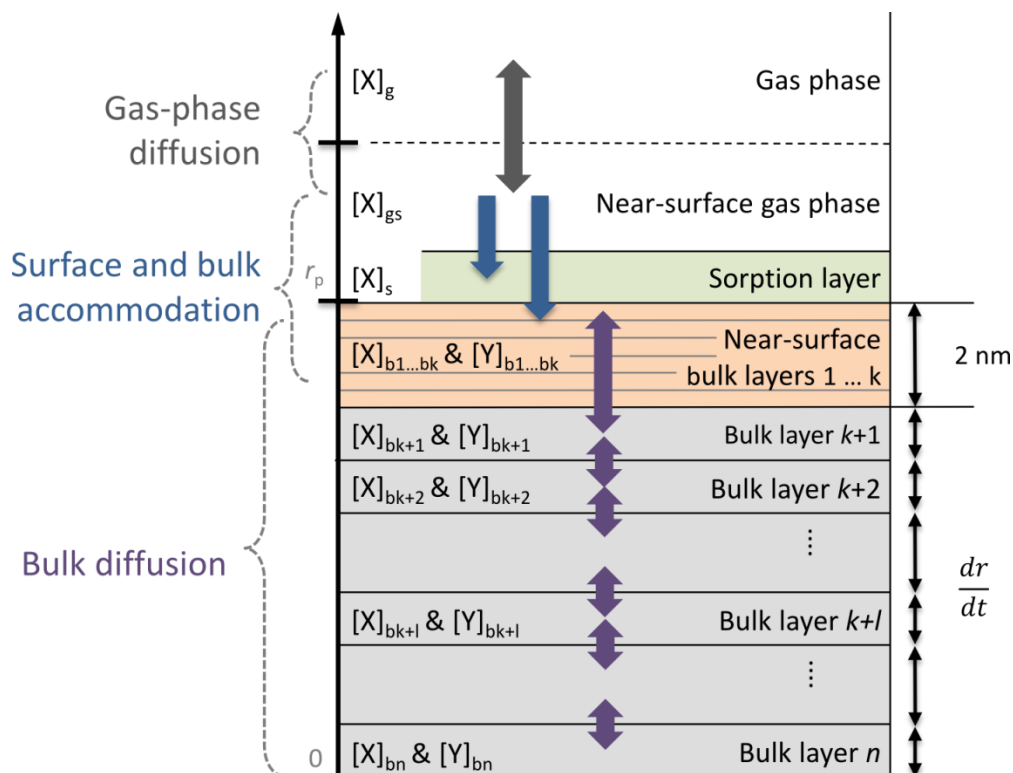

Figure S1. Schematic of KM-GAP and key mass transport processes including gas-phase diffusion (grey arrow), accommodation (blue arrow) and bulk diffusion (purple arrows). The near-surface bulk (orange box) has been resolved finely with  $k$  layers to keep track of a 1 nm surface region that is crucial for formation of an initial ice embryo in immersion freezing scenarios. All  $n$  bulk layers are allowed to grow and shrink.

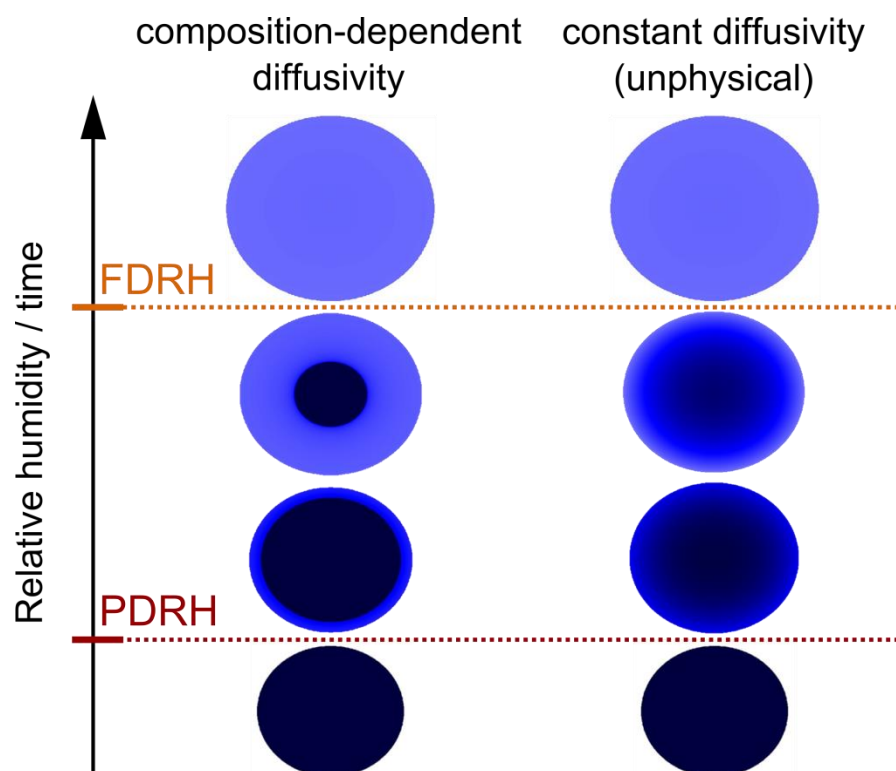

Figure S2. Schematic evolution of particle morphology upon humidification in two different scenarios. In the left column, diffusivity depends on water content and the liquefaction process is characterized by a sharp diffusion front moving into the particles. For comparison, the right column shows an unrealistic case of water diffusing into the particle with constant diffusivity.



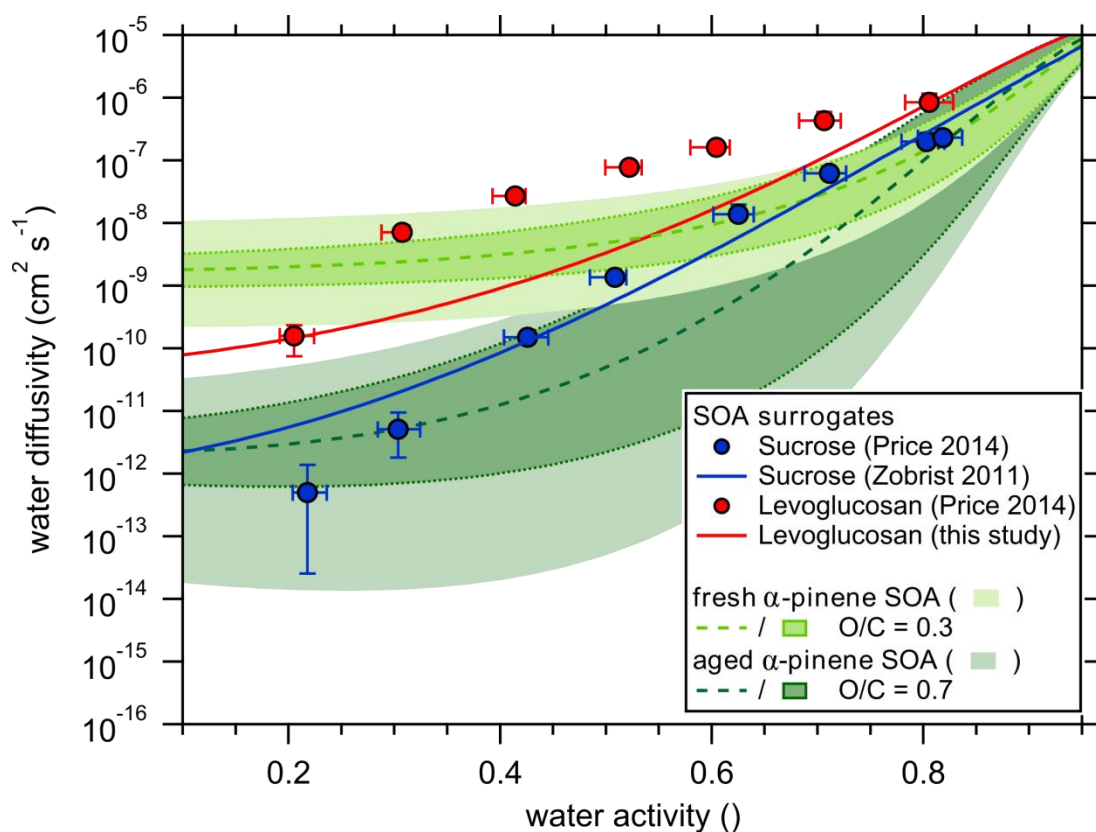

Figure S3. Estimated water diffusivity ranges for  $\alpha$ -pinene SOA and comparison of water diffusivity in sucrose and levoglucosan matrices with experimental results by Price et al. (2014) at room temperature. DH<sub>2</sub>O in levoglucosan is higher than DH<sub>2</sub>O in sucrose, which is captured by the method proposed in this study. The differing curvature is a reminiscent feature of the sucrose parameterization used as a basis. Fresh  $\alpha$ -pinene SOA ( $O/C = 0.3 \pm 0.1$ , orange bands) shows higher DH<sub>2</sub>O than aged  $\alpha$ -pinene SOA ( $O/C = 0.7 \pm 0.1$ , green bands). The dark bands indicate uncertainty in DH<sub>2</sub>O at a fixed O/C (0.3 and 0.7, respectively) whereas the light bands indicate the entire expected range of DH<sub>2</sub>O in the given O/C range (0.2—0.4 and 0.6—0.8, respectively).

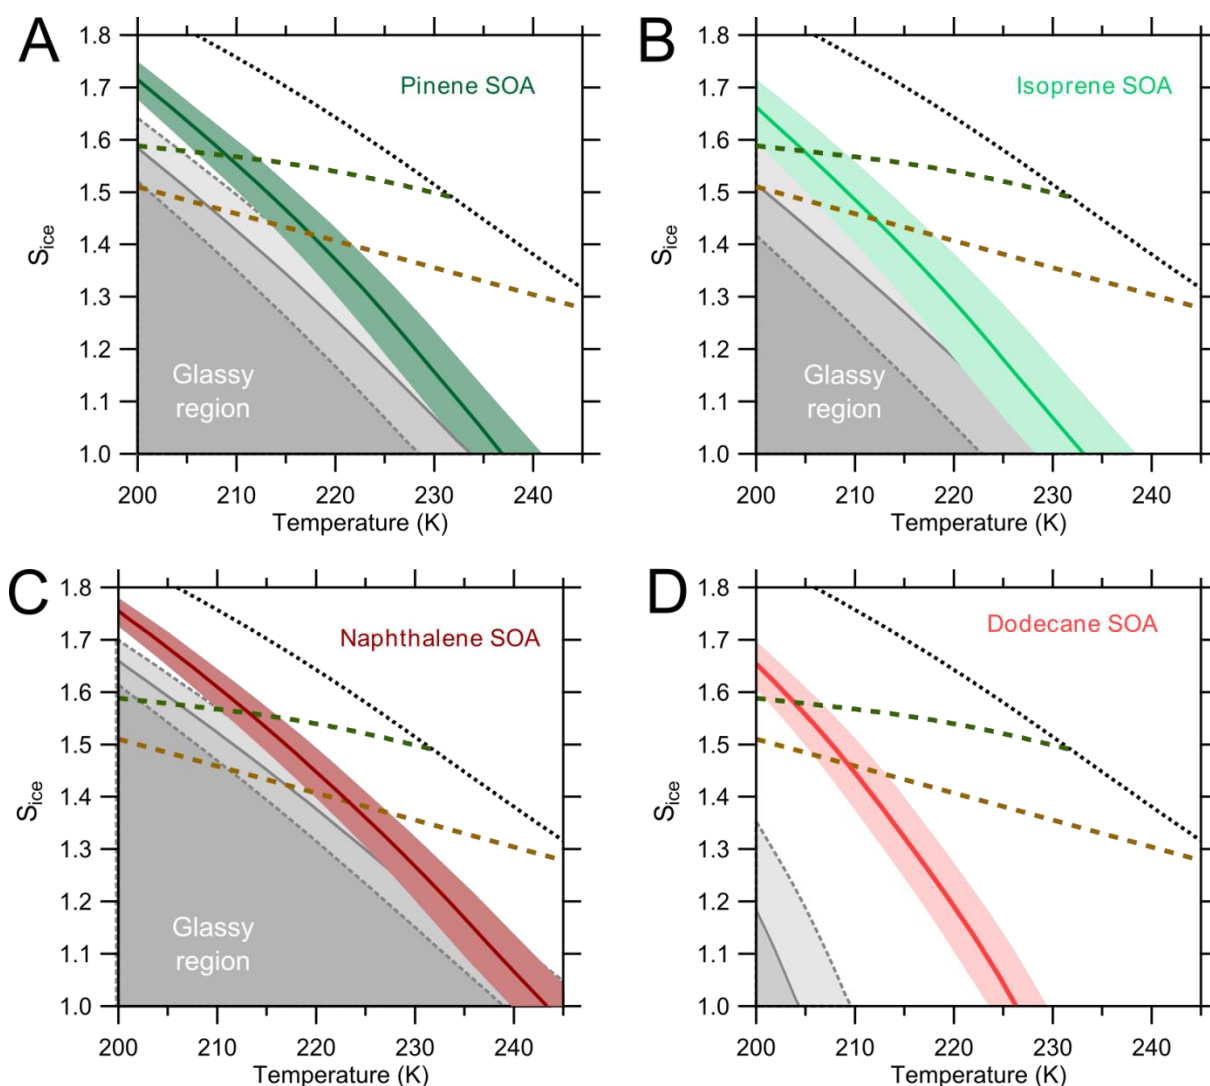

Figure S4. Quasi-equilibrium ( $RH_g$ , grey lines) and kinetic (FDRH, coloured lines) glass transition values of the four SOA precursor classes (A) a-pinene, (B) isoprene, (C) naphthalene, and (D) dodecane. Naphthalene SOA shows the highest glass transition values whereas dodecane SOA shows the lowest, in agreement with particle bounce experiments by Saukko et al. (2012). Uncertainty in quasi-equilibrium glass transition is given by dashed lines and grey shades; the uncertainty in FDRH is shown as shaded bands in the respective colour. These uncertainties arise from uncertainty in input parameters  $\kappa_{org}$ ,  $k_{GT}$  and  $T_{g,org}$  as given in Table A1.

142

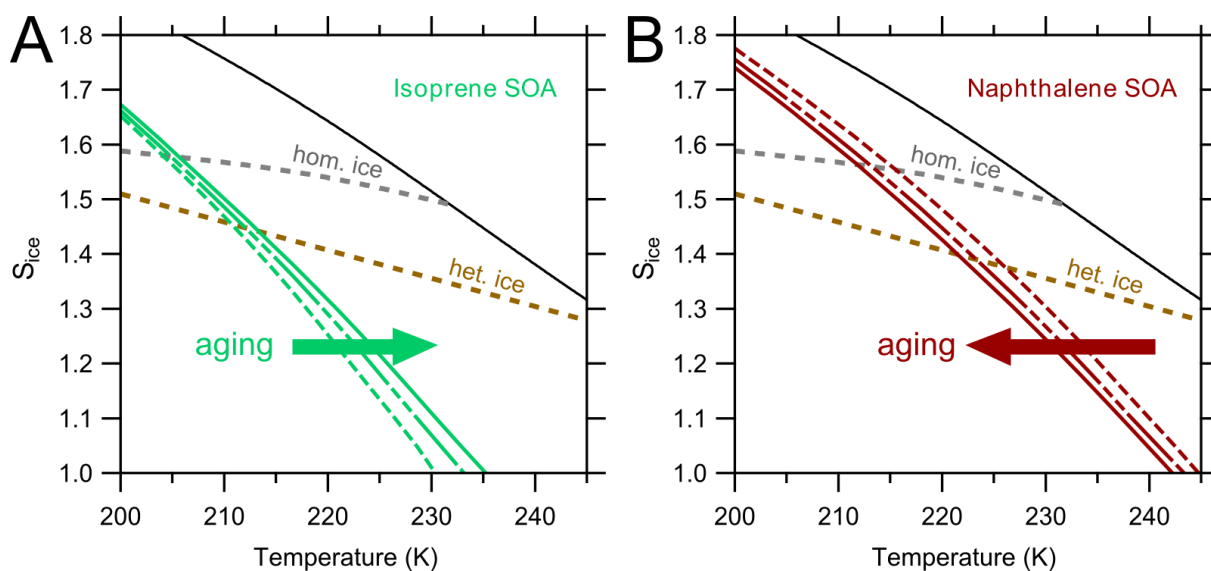

143

144 Figure S5. Effect of particle ageing on full deliquescence relative humidity (FDRH, solid and  
 145 dashed lines) for (A) isoprene and (B) naphthalene SOA. Isoprene SOA shows slight  
 146 hardening upon increase in O/C (indicated by higher FDRH), whereas Naphthalene SOA  
 147 exhibits slight softening (indicated by lower FDRH).

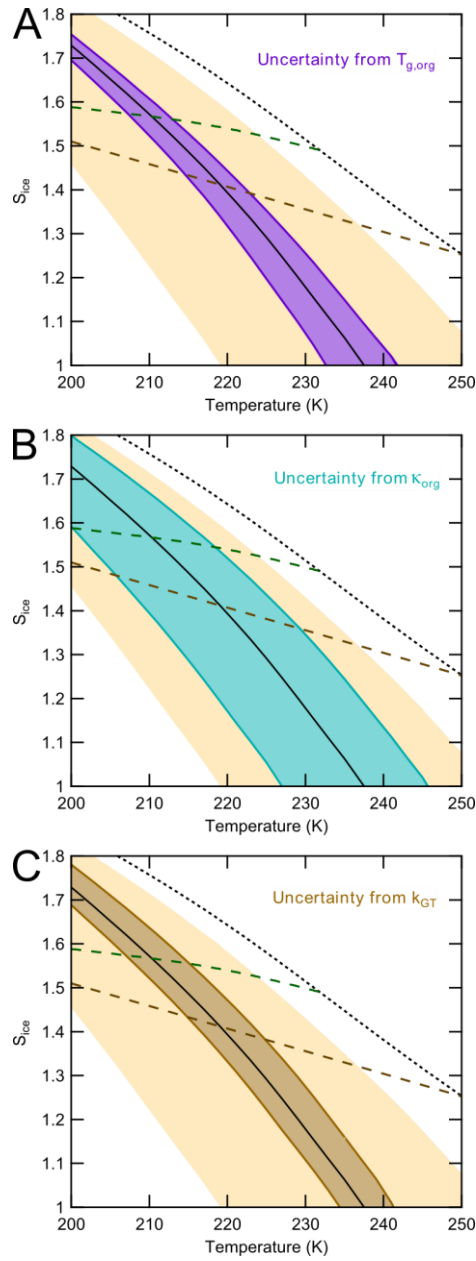

Figure S6. FDRH and uncertainties from different model input parameters in simulations of particle deliquescence (100 nm particles, humidified at a rate of 1 % RH min<sup>-1</sup>, starting at  $S_{ice} = 1$ ) using the diffusivity estimation scheme along with the SOA best guess parameters of Koop et al. (2011) (cf. Table A1). The FDRH model results for the best guess parameters (black solid line) are subject to very high uncertainties when the full uncertainty range is considered, the orange shaded area denotes the worst possible scenario from the parameter ranges in Table A1. The uncertainty arising from sole uncertainty in  $T_{g,org}$  is shown as purple shaded area in panel A, uncertainties arising from  $\kappa_{org}$  and  $k_{GT}$  are given in panels B and C and shaded in cyan and brown, respectively. Note that the displayed errors are not fully additive, i.e. the orange shaded area is not the sum of the purple, cyan and brown areas.

## 159    **Supporting Movies**

160

161    Movie S1. Simulation of humidification of a 200 nm sucrose particle from 60 % to 95 % RH  
162    at 215 K at a rate of 1 % RH min<sup>-1</sup>. Water activity of the particle and ambient RH (left bottom  
163    corner) are colour-coded from dark blue (low  $a_w$ /RH) to light blue (high  $a_w$ /RH).

164

165    Movie S2. Simulated humidification of a 200 nm sucrose particle from 60 % to 95 % RH at  
166    215 K under the unphysical assumption that water diffusivity does not change with water  
167    content and instead was fixed to  $5 \cdot 10^{-14}$  cm<sup>2</sup> s<sup>-1</sup>. The employed humidification rate is 1 % RH  
168    min<sup>-1</sup>. Water activity of the particle and ambient RH (left bottom corner) are colour-coded  
169    from dark blue (low  $a_w$ /RH) to light blue (high  $a_w$ /RH).

## 170 **References**

- 171 Angell, C. A.: in: *Relaxations in Complex Systems*, edited by: Ngai, K., and Wright, G. B.,  
 172 National Technical Information Service, I.S. Department of Commerce, Springfield, VA,  
 173 1985.
- 174 Angell, C. A.: Formation of glasses from liquids and biopolymers, *Science*, 267, 1924-1935,  
 175 1995.
- 176 Fulcher, G. S.: Analysis of recent measurements of the viscosity of glasses, *J. Am. Ceram.*  
 177 *Soc.*, 8, 339-355, 10.1111/j.1151-2916.1925.tb16731.x, 1925.
- 178 Gordon, M., and Taylor, J. S.: Ideal copolymers and the 2nd-order transitions of synthetic  
 179 rubbers. 1. Non-crystalline copolymers, *J. Appl. Chem.*, 2, 493-500, 1952.
- 180 Kautzman, K. E., Surratt, J. D., Chan, M. N., Chan, A. W. H., Hersey, S. P., Chhabra, P. S.,  
 181 Dalleska, N. F., Wennberg, P. O., Flagan, R. C., and Seinfeld, J. H.: Chemical Composition of  
 182 Gas- and Aerosol-Phase Products from the Photooxidation of Naphthalene, *J. Phys. Chem. A*,  
 183 114, 913-934, 10.1021/jp908530s, 2010.
- 184 Kauzmann, W.: The nature of the glassy state and the behavior of liquids at low temperatures,  
 185 *Chem. Rev.*, 43, 219-256, 10.1021/cr60135a002, 1948.
- 186 Koop, T., Bookhold, J., Shiraiwa, M., and Pöschl, U.: Glass transition and phase state of  
 187 organic compounds: dependency on molecular properties and implications for secondary  
 188 organic aerosols in the atmosphere, *Phys. Chem. Chem. Phys.*, 13, 19238-19255, 2011.
- 189 Lienhard, D. M., Bones, D. L., Zuend, A., Krieger, U. K., Reid, J. P., and Peter, T.:  
 190 Measurements of Thermodynamic and Optical Properties of Selected Aqueous Organic and  
 191 Organic-Inorganic Mixtures of Atmospheric Relevance, *J. Phys. Chem. A*, 116, 9954-9968,  
 192 10.1021/jp3055872, 2012.
- 193 Murphy, D. M., and Koop, T.: Review of the vapour pressures of ice and supercooled water  
 194 for atmospheric applications, *Q. J. R. Meteorol. Soc.*, 131, 1539-1565, 10.1256/qj.04.94,  
 195 2005.
- 196 Petters, M. D., and Kreidenweis, S. M.: A single parameter representation of hygroscopic  
 197 growth and cloud condensation nucleus activity, *Atmos. Chem. Phys.*, 7, 1961-1971, 2007.
- 198 Pöschl, U., Rudich, Y., and Ammann, M.: Kinetic model framework for aerosol and cloud  
 199 surface chemistry and gas-particle interactions - Part 1: General equations, parameters, and  
 200 terminology, *Atmos. Chem. Phys.*, 7, 5989-6023, 2007.
- 201 Price, H. C., Murray, B. J., Mattsson, J., O'Sullivan, D., Wilson, T. W., Baustian, K. J., and  
 202 Benning, L. G.: Quantifying water diffusion in high-viscosity and glassy aqueous solutions  
 203 using a Raman isotope tracer method, *Atmos. Chem. Phys.*, 14, 3817-3830, 10.5194/acp-14-  
 204 3817-2014, 2014.
- 205 Saukko, E., Lambe, A. T., Massoli, P., Koop, T., Wright, J. P., Croasdale, D. R., Pedernera,  
 206 D. A., Onasch, T. B., Laaksonen, A., Davidovits, P., Worsnop, D. R., and Virtanen, A.:  
 207 Humidity-dependent phase state of SOA particles from biogenic and anthropogenic  
 208 precursors, *Atmos. Chem. Phys.*, 12, 7517-7529, 10.5194/acp-12-7517-2012, 2012.
- 209 Seinfeld, J. H., and Pandis, S. N.: *Atmospheric chemistry and physics - From air pollution to*  
 210 *climate change*, John Wiley & Sons, Inc., New York, 2006.
- 211 Shiraiwa, M., Pfrang, C., Koop, T., and Pöschl, U.: Kinetic multi-layer model of gas-particle  
 212 interactions in aerosols and clouds (KM-GAP): linking condensation, evaporation and

213 chemical reactions of organics, oxidants and water, *Atmos. Chem. Phys.*, 12, 2777-2794,  
 214 10.5194/acp-12-2777-2012, 2012.

215 Stillinger, F. H.: Relaxation and flow mechanisms in fragile glass-forming liquids, *J. Chem.*  
 216 *Phys.*, 89, 6461-6469, 10.1063/1.455365, 1988.

217 Tammann, G., and Hesse, W.: The dependancy of viscosity on temperature in hypothermic  
 218 liquids, *Z. Anorg. Allg. Chem.*, 156, 14, 1926.

219 Vogel, H.: The temperature dependence law of the viscosity of fluids, *Physik. Z.*, 22, 645-  
 220 646, 1921.

221 Winkler, P. M., Vrtala, A., Rudolf, R., Wagner, P. E., Riipinen, I., Vesala, T., Lehtinen, K. E.  
 222 J., Viisanen, Y., and Kulmala, M.: Condensation of water vapor: Experimental determination  
 223 of mass and thermal accommodation coefficients, *J. Geophys. Res. Atmos.*, 111, D19202,  
 224 10.1029/2006jd007194, 2006.

225 Yee, L. D., Craven, J. S., Loza, C. L., Schilling, K. A., Ng, N. L., Canagaratna, M. R.,  
 226 Ziemann, P. J., Flagan, R. C., and Seinfeld, J. H.: Secondary organic aerosol formation from  
 227 low-NO<sub>x</sub> photooxidation of dodecane: evolution of multigeneration gas-phase chemistry and  
 228 aerosol composition, *J. Phys. Chem. A*, 116, 6211-6230, 2012.

229 Zhang, X., Schwantes, R. H., Coggon, M. M., Loza, C. L., Schilling, K. A., Flagan, R. C., and  
 230 Seinfeld, J. H.: Role of ozone in SOA formation from alkane photooxidation, *Atmos. Chem.*  
 231 *Phys.*, 14, 1733-1753, 10.5194/acp-14-1733-2014, 2014.

232 Zobrist, B., Marcolli, C., Pedernera, D. A., and Koop, T.: Do atmospheric aerosols form  
 233 glasses?, *Atmos. Chem. Phys.*, 8, 5221-5244, 2008.

234 Zobrist, B., Soonsin, V., Luo, B. P., Krieger, U. K., Marcolli, C., Peter, T., and Koop, T.:  
 235 Ultra-slow water diffusion in aqueous sucrose glasses, *Phys. Chem. Chem. Phys.*, 13, 3514-  
 236 3526, 10.1039/c0cp01273d, 2011.

237 Zuend, A., and Seinfeld, J. H.: Modeling the gas-particle partitioning of secondary organic  
 238 aerosol: the importance of liquid-liquid phase separation, *Atmos. Chem. Phys.*, 12, 3857-  
 239 3882, 10.5194/acp-12-3857-2012, 2012.

240
