# Supplementary material for: Competition between water uptake and ice nucleation by glassy organic aerosol particles
Source: Copernicus journal article supplement (doi:10.5194/acp-14-12513-2014), 2014-11-27
Supplement: Supplementary file 2 [file acp-14-12513-2014-supplement.zip]

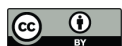

## *Supplement of*

# **Competition between water uptake and ice nucleation by glassy organic aerosol particles**

**T. Berkemeier et al.**

*Correspondence to:* T. Berkemeier (t.berkemeier@mpic.de) and T. Koop (thomas.koop@uni-bielefeld.de)

- [acp-14-12513-2014-supplement-cover-letter.pdf](#)
- [Movie S1.MPG](#)
- [Movie S2.MPG](#)
- [Supplement Revision\\_Berkemeier\\_ACP\\_20141028.pdf](#)
